# Supplementary material for: Assessment of the chemical hazard awareness of petrol tanker driver: A case study
Source: PubMed Central journal article supplement — Heliyon. 2019 Aug 26;5(8):e02368. doi: 10.1016/j.heliyon.2019.e02368 (PMC6717159; doi:10.1016/j.heliyon.2019.e02368), 2019-08-26
Supplement: mmc1.pdf [file mmc1.pdf]

Supplementary sheet

**Questionnaire for Survey**

|                                                                                                  |                         |                  |                |                 |                  |
|--------------------------------------------------------------------------------------------------|-------------------------|------------------|----------------|-----------------|------------------|
| Umur/ age:                                                                                       | A. 17-25                | B.26-35          | C.36-45        | D. 45-51        | E.51 dan ke atas |
| Brapakah kuantiti rokok yang anda ambil dalam sehari :<br>Quantity of cigarette consume in a day | A. 31 batang dan keatas | B.20 - 30 batang | C.10-19 batang | D. 1 - 9 batang | E. Tiada         |

| <b>Period of exposure of the worker</b>                                                                                                                               |                     |                     |                     |                     |                    |
|-----------------------------------------------------------------------------------------------------------------------------------------------------------------------|---------------------|---------------------|---------------------|---------------------|--------------------|
|                                                                                                                                                                       | <b>1</b>            | <b>2</b>            | <b>3</b>            | <b>4</b>            | <b>5</b>           |
| 1. Sudah berapa lama anda bekerja sebagai pemandu lori tanker? (1)<br>how long have you been a petrol tanker driver                                                   | kurang dari 1 tahun | kurang dari 2 tahun | kurang dari 5 tahun | kurang dari 8 tahun | lebih dari 9 tahun |
| 2. Berapa lama (jam) anda bekerja dalam sehari? (1)<br>how long are your working hours in a day                                                                       | kurang dari 2 jam   | 3 ke 5 jam          | 6 ke 7 jam          | 7 ke 8 jam          | lebih dari 8 jam   |
| 3. Berapa kerapkah kebocoran/ tumpahan minyak yang anda ketahui dalam sehari? (1)<br>how frequent does spillage/leakage did you notice in a day                       | sentiasa            | selalu              | pernah beberapakali | jarang              | tidak pernah       |
| 4. Berapakan kekerapan anda terhidu akibat tertumpah/kebocoran petrol dalam sehari? (1)<br>how frequent did you smell the petrol due to the spillage/leakage in a day | sentiasa            | selalu              | pernah beberapakali | jarang              | tidak pernah       |

| <b>Awareness of exposure</b>                                                                                                           |          |        |                     |        |              |
|----------------------------------------------------------------------------------------------------------------------------------------|----------|--------|---------------------|--------|--------------|
| 5. Adakah anda tahu apa itu bahan kimia (chemical)? (2)<br>did you know what is chemical                                               | tidak    |        |                     |        | ya           |
| 6. Adakah anda tahu bahaya bahan kimia? (2)<br>did you know the danger of chemical                                                     | tidak    |        |                     |        | ya           |
| 7. Tahukah anda produk petrol mengandungi bahan kimia? (2)<br>did you know petrol product contain chemical substance                   | tidak    |        |                     |        | ya           |
| 8. Adakah anda tahu bagaimana anda boleh terdedah kepada bahan kimia? (2)<br>did you know how can you be exposed to chemical substance | tidak    |        |                     |        | ya           |
| 9. Berapa kerapkah anda terdedah/tersentuh (direct contact) dengan petrol ketika bekerja? (2)                                          | sentiasa | selalu | pernah beberapakali | jarang | tidak pernah |

|                                                                                                                                                                                                                                      |          |        |                     |        |              |
|--------------------------------------------------------------------------------------------------------------------------------------------------------------------------------------------------------------------------------------|----------|--------|---------------------|--------|--------------|
| how frequent are you come in to direct contact (touch/smell) with petrol during work                                                                                                                                                 |          |        |                     |        |              |
| 10. Pernahkan anda mengalami simtom simtom kurang sihat akibat daripada terdedah dengan bahan kimia/petrol? (2)<br>Have you ever experienced a symptom which effect your health as a result from being exposed to chemical / petrol? | sentiasa | selalu | pernah beberap kali | jarang | tidak pernah |
| 11. Adakah anda mengalami simtom seperti pening/ mual ketika upload dan offload minyak?(2)<br>Do you experience symptoms such as dizziness / nausea during upload and offload of petrol?                                             | sentiasa | selalu | pernah beberap kali | jarang | tidak pernah |
| 12. Adakah peralatan keselamatan yang disediakan oleh majikan anda sesuai dengan pekerjaan anda? (3)<br>Are the safety equipment provided by your employer suitable with your work condition?                                        | tidak    |        |                     |        | ya           |
| 13. Adakah dengan memakai peralatan keselamatan memadai untuk melindungi anda daripada bahaya bahan kimia? (2)<br>Is it by wearing adequate safety equipment to protect you from the dangers of chemicals?                           | tidak    |        |                     |        | ya           |

| <b>Health</b>                                                                                                                                                         |                    |             |                     |       |                |
|-----------------------------------------------------------------------------------------------------------------------------------------------------------------------|--------------------|-------------|---------------------|-------|----------------|
| 14. Berapa kerapkah anda melakukan pemeriksaan kesihatan? (3)<br>How often do you do a health check/medical checkup?                                                  | tidak pernah       |             | pernah beberap kali |       | sentiasa       |
| 15. Berapa kerapkah majikan anda menyediakan servis pemeriksaan kesihatan kepada anda? (3)<br>How often does your employer provide you with a health checkup service? | 2 tahun sekali     |             | setahun sekali      |       | 6 bulan sekali |
| 16. Adakah majikan anda menyediakan servis sokongan perubatan (medical support)? (3)<br>Does your employer provide medical support services?                          | tidak              |             |                     |       | ya             |
| 17. Adakah servis sokongan perubatan (medical support) yang disediakan mencukupi? (3)<br>Does the medical support provide to you is sufficient?                       | tidak              |             |                     |       | ya             |
| 18. Dimanakah anda rasa tahap kesihatan anda sekarang?(3)<br>Where do you think your health level is now                                                              | sangat tidak sihat | tidak sihat | neutral             | sihat | sangat sihat   |

|                                                                                                                                                                                                                                                          |    |  |  |  |       |
|----------------------------------------------------------------------------------------------------------------------------------------------------------------------------------------------------------------------------------------------------------|----|--|--|--|-------|
| 19. Adakah anda mengalami penyakit seperti semput, lelah, batuk ? (3)<br>Do you have any illnesses such as asthma, tiredness, coughs?                                                                                                                    | ya |  |  |  | tidak |
| 20. Jika anda mengalami penyakit seperti kerap demam, lelah, batuk, muntah, adakah anda rasa keadaan ini berpunca dari pekerjaan anda?(3)<br>If you have frequent illness, fatigue, coughing, vomiting, do you think this condition is due to your work? | ya |  |  |  | tidak |

| <b>Knowledge</b>                                                                                                                                                                                                        |                              |                 |                         |                           |                                |
|-------------------------------------------------------------------------------------------------------------------------------------------------------------------------------------------------------------------------|------------------------------|-----------------|-------------------------|---------------------------|--------------------------------|
|                                                                                                                                                                                                                         | 1                            | 2               | 3                       | 4                         | 5                              |
| 21. Senaraikan jenis-jenis bahan kimia yang anda tahu terkandung di dalam petrol? (4)<br>List the types of chemicals you know contained in petrol?                                                                      |                              |                 |                         |                           |                                |
| 22. Dimanakah anda mengetahui berkenaan bahaya bahan kimia? (4)<br>How did you know about the danger of chemicals                                                                                                       | melalui perbualan discussion | Televisyen tv   | surat khabar news paper | bahan bacaan lain reading | mengikuti kelas class/training |
| 23. Pada pandangan anda apakah tahap bahaya jika terhidu bahan kimia? (4)<br>In your opinion, what is the level of danger when inhaled chemicals?                                                                       | tidak tahu                   | tidak merbahaya | normal                  | merbahaya                 | sangat merbahaya               |
| 24. Bahan kimia di dalam petrol berbahaya kepada manusia kerana mudah meruap? (4)<br>Chemicals in petrol are harmful to humans because they are volatile?                                                               | sangat tidak setuju          | tidak setuju    | neutral                 | setuju                    | sangat setuju                  |
| 25. Jika diberi peluang mahukah anda mengikuti kelas bagi memahami bahaya bahan kimia dan hazard kerja? (4)<br>If given the opportunity would you attend the class to understand hazardous chemicals and hazardous work | tidak                        |                 |                         |                           | ya                             |
| 25. Mahukah anda mengubah cara bekerja kepada yang lebih selamat? (4)<br>26. Would you willing to change and adopt a safer work practice                                                                                | tidak                        |                 |                         |                           | ya                             |

### Linkert Scale

| Rating |                                          | Explanation                        |                                    |
|--------|------------------------------------------|------------------------------------|------------------------------------|
| 1      | Sangat tidak setuju<br>Strongly disagree | tidak tahu<br>Don't know           | sentiasa<br>Always                 |
| 2      | Tidak setuju<br>Disagree                 | tidak merbahaya<br>Harmless        | selalu<br>Frequent                 |
| 3      | Neutral<br>Neutral                       | normal<br>Normal                   | pernah beberapakali<br>a few times |
| 4      | Setuju<br>Agree                          | merbahaya<br>Hazardous             | jarang<br>Rarely                   |
| 5      | sangat setuju<br>Strongly agree          | sangat merbahaya<br>very hazardous | tidak pernah<br>never              |
